# Supplementary material for: Thermoelectric characteristics of Sb2Te3 thin films formed via surfactant-assisted electrodeposition
Source: Royal Society of Chemistry journal article supplement (doi:10.1039/c3ta01631e), 2013-01-01
Supplement: c3ta01631e.pdf [file c3ta01631e.pdf]

SUPPORTING INFORMATION

## Thermoelectric Characteristics of Sb<sub>2</sub>Te<sub>3</sub> Thin Films Formed via Surfactant-Assisted Electrodeposition

In-Joon Yoo<sup>a,b</sup>, Youngsup Song<sup>a</sup>, Dong Chan Lim<sup>a</sup>, Nosang V. Myung<sup>c</sup>, Kyu Hyoung Lee<sup>d</sup>, Minju Oh<sup>e</sup>, Dongyun Lee<sup>e</sup>, Yang Do Kim<sup>b</sup>, Seil Kim<sup>f</sup>, Yong-Ho Choa<sup>f</sup>, Joo Yul Lee<sup>a</sup>, Kyu Hwan Lee<sup>a</sup>, and Jae-Hong Lim<sup>a\*</sup>

<sup>a</sup>*Electrochemistry Department, Korea Institute of Materials Science, Changwon 641-010, Korea*

<sup>b</sup>*School of Materials Science and Engineering, Pusan National University, Busan 609-735, Korea*

<sup>c</sup>*Department of Chemical and Environmental Engineering, University of California-Riverside, Riverside, CA 92521*

<sup>d</sup>*Advanced Materials Research Center, Samsung Advanced Institute of Technology, Samsung Electronics, Yongin 446-712, Korea*

<sup>e</sup>*Department of NanoFusion Technology, Pusan National University, Busan 609-735, Korea*

<sup>f</sup>*Department of Bionano Technology, Hanyang University, Ansan 426-791, Korea*

---

\* Author to whom all correspondence should be addressed;

E- mail: lim@kims.re.kr

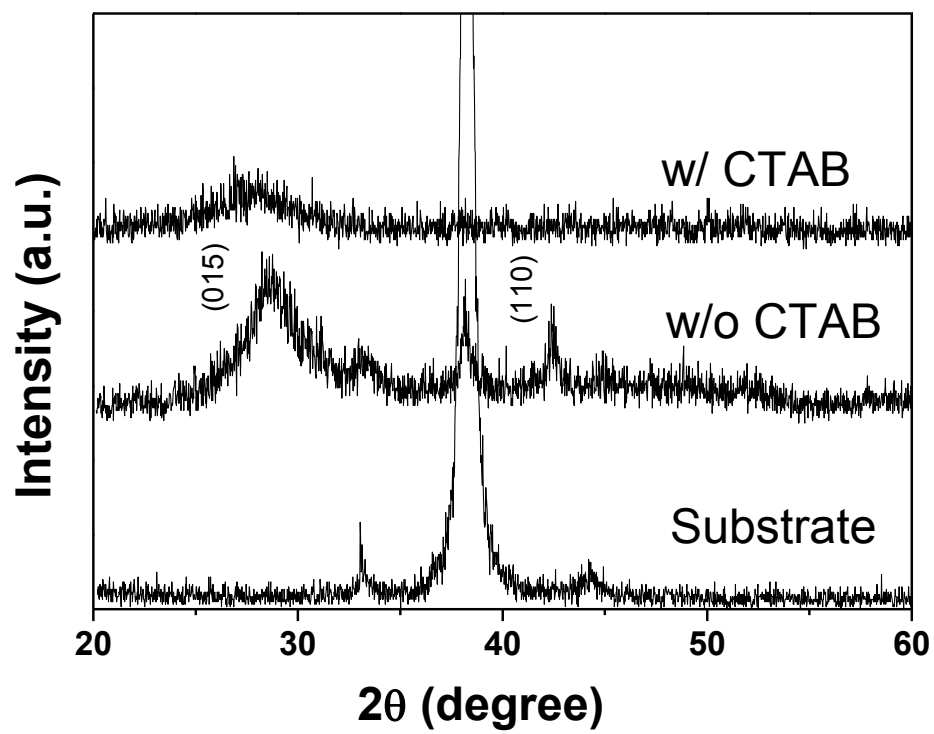

Figure S1. XRD patterns of the  $\text{Sb}_2\text{Te}_3$  films formed with and without CTAB.

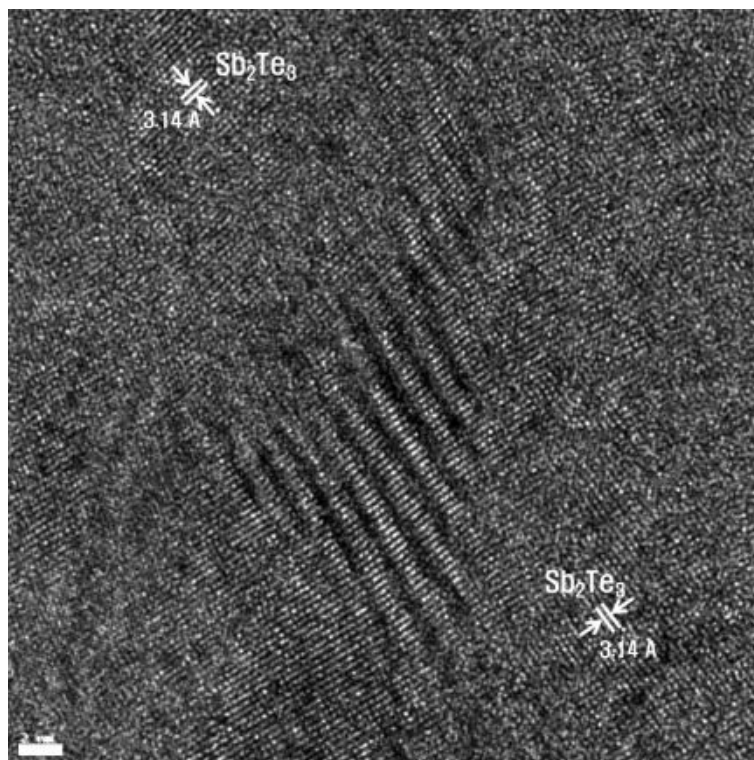

(a)

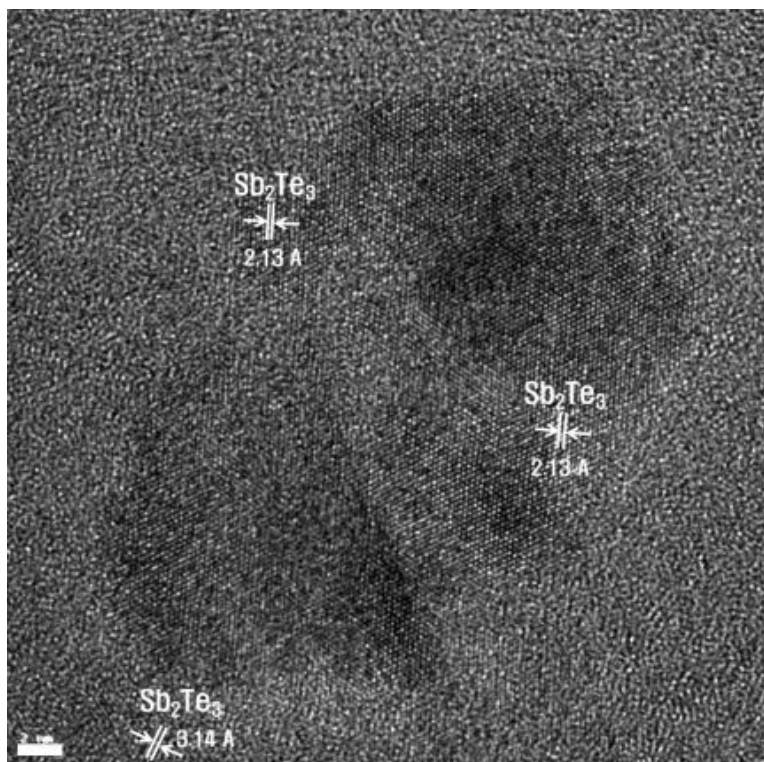

(b)

Figure S2. TEM images (scale bar = 2 nm) of the  $\text{Sb}_2\text{Te}_3$  films formed without CTAB: (a) before and (b) after annealing at  $200 \text{ }^\circ\text{C}$ .
